# Supplementary material for: NDP@MnO₂ hydrogel combined with photothermal therapy for postoperative anti-recurrence treatment of pancreatic cancer
Source: Research Square preprint supplement (doi:10.21203/rs.3.rs-6212014/v1), 2025-04-01
Supplement: Supplementary file 1 [file eefc4a0481bd153127ec0289.pdf]

## Supporting Information

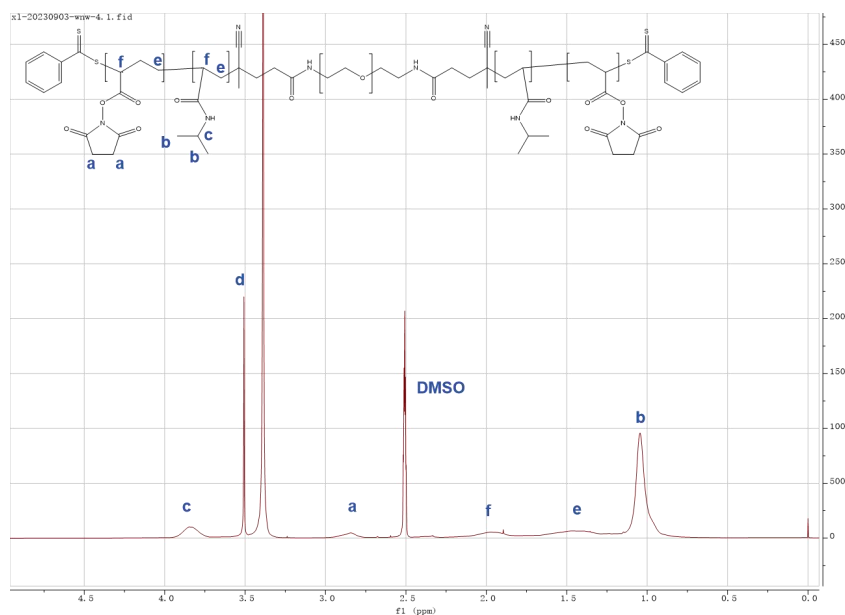

**Figure S1.**  $^1\text{H}$  NMR spectra of poly((N-isopropylacrylamide<sub>63</sub>-co-dopamine<sub>17</sub>)-b-poly(ethylene glycol)-b-poly(N-isopropylacrylamide<sub>63</sub>-co-dopamine<sub>17</sub>)) (Poly(NIPAM<sub>63</sub>-co-DOPA<sub>17</sub>)-p(ethylene glycol)<sub>90</sub>-poly(NIPAM<sub>63</sub>-co-DOPA<sub>17</sub>), DTBP).

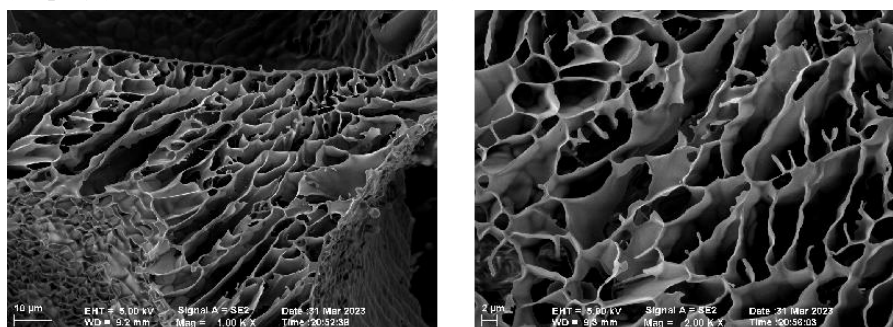

**Figure S2.** SEM image of NDP@MnO<sub>2</sub> Hydrogel. Scale bar, 10  $\mu\text{m}$  and 2  $\mu\text{m}$ . Observed the typical 3D porous structure by SEM images of freeze-dried NDP@MnO<sub>2</sub> hydrogel.

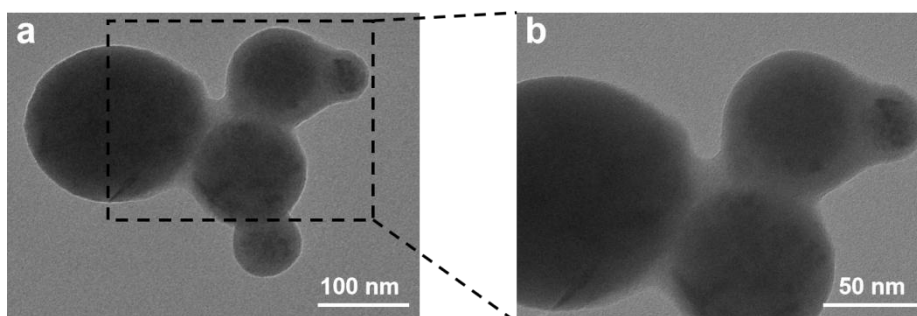

**Figure S3.** TEM image of NDP@MnO<sub>2</sub> Hydrogel. Scale bar, 100  $\mu\text{m}$  and 50  $\mu\text{m}$ .

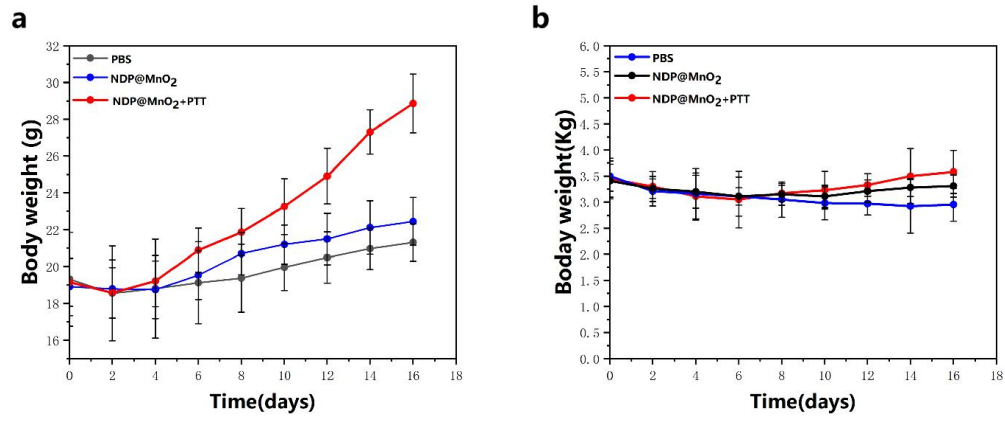

**Figure S4.** The changes in body weight of the (a) mice and (b) rabbits groups after experiment within 16 days. Data are expressed as mean±S.D. (mice n=10, rabbits n=3)
